# Supplementary material
Source: publisher figshare collection journal article supplement (https://gsapubs.figshare.com/ndownloader/files/27561335)
Supplement: Supplementary file 1 [file 27561335]

	Balkaria	Bolca	Calcaire_Grossier	Chiapas	Ciply_Malogne_Phosphatic_Chalk	Dabakhan_Canyon	Danata_Formation	Elam	Fur_Formation	Gorny_Luch	Istehbanat	Kapurdi_Formation	La_Meseta_Formation_Cucullaea_I_Allomember	Landana	Lillebaelt_Clay	Limhamn	London_Clay	Maastricht	Monte_Solane	Nardo	Pindos_Unit	Ras_Gharib_A	Stolleklint_Clay
Balkaria	0	0	1	0.155903758	1	1	0.261288746	0.243041724	0.264950362	0.268167162	0.672272629	0.652173913	0.672272629	1	1	0.652173913	0.521665355	1	0.6243837	0.490635417	1	0.672272629	0.230769231
Bolca	0	0	0	0.169990622	0.755746791	0.735872211	0.433840239	0.404330099	0.355965457	0.358460359	0	0	0.622263634	0.299071218	0.793814433	0.862441759	0.50824897	0.808970375	0.457472525	0.60973312	1	0.32995774	0.425492157
Calcaire_Grossier	1	0	0	1	1	0.642857143	0.607887782	0.57430925	0.614396198	0.620045882	0.575365882	0.537889832	1	0.687523364	1	1	0.485452164	1	1	1	1	0.575365882	0.695744624
Chiapas	0.155903758	0.169990622	1	0	0.764812384	1	0.271516848	0.52918998	0.421745092	0.717673071	0.764812384	0.51165508	0.764812384	0.384615385	1	0.51165508	0.421745092	0.792314694	0.715469294	0.522557933	1	0.54801965	0.357476701
Ciply_Malogne_Phosphatic_Chalk	1	0.755746791	1	0.764812384	0	1	0.855216027	1	1	1	1	1	1	0.672272629	1	0.744243258	0.857945609	0.053909217	1	0.374068321	0.672272629	1	1
Dabakhan_Canyon	1	0.735872211	0.642857143	1	1	0	0.671569096	0.216556246	0.467045984	0.474740183	0.613836069	0.781494368	0.801980198	0.709213012	0.709213012	1	0.678344135	1	0.520147761	1	1	0.441060775	0.867374416
Danata_Formation	0.261288746	0.433840239	0.607887782	0.271516848	0.855216027	0.671569096	0	0.502538071	0.344768788	0.362981816	0.708551432	0.161729342	0.561330707	0.517271218	0.517271218	0.667407167	0.441020101	0.881422472	0.405932876	0.554376658	1	0.271516848	0.517673858
Elam	0.243041724	0.404330099	0.57430925	0.52918998	1	0.216556246	0.502538071	0	0.391304348	0.290322581	0.241694569	0.642652735	0.683403744	0.749393317	0.495129821	0.821013666	0.391304348	1	0.183509334	0.822877597	1	0.52918998	0.626796513
Fur_Formation	0.264950362	0.355965457	0.614396198	0.421745092	1	0.467045984	0.344768788	0.391304348	0	0.431658884	0.56759216	0.334074658	0.56759216	0.521665355	0.521665355	0.50365693	0.413289041	1	0.613231237	0.63642574	1	0.421745092	0.192676136
Gorny_Luch	0.268167162	0.358460359	0.620045882	0.717673071	1	0.474740183	0.362981816	0.290322581	0.431658884	0	0.282531521	0.6764399	0.717673071	0.769903592	0.769903592	0.840568386	0.576630912	1	0.209019728	0.645724833	0.769903592	0.573037089	0.766949872
Istehbanat	0.672272629	0	0.575365882	0.764812384	1	0.613836069	0.708551432	0.241694569	0.56759216	0.282531521	0	0.744243258	0.54801965	0.672272629	1	0.744243258	0.421745092	1	0.715469294	0.838204273	1	0.54801965	0.831230103
Kapurdi_Formation	0.652173913	0	0.537889832	0.51165508	1	0.781494368	0.161729342	0.642652735	0.334074658	0.6764399	0.744243258	0	0.744243258	0.652173913	1	0.723705956	0.672237186	1	0.428571429	0.818049355	1	0.313115179	0.447286751
La_Meseta_Formation_Cucullaea_I_Allomember	0.672272629	0.622263634	1	0.764812384	1	0.801980198	0.561330707	0.683403744	0.56759216	0.717673071	0.54801965	0.744243258	0	1	0.155903758	0.744243258	0.277397379	1	0.46083369	0.838204273	1	0.54801965	0.506768538
Landana	1	0.299071218	0.687523364	0.384615385	0.672272629	0.709213012	0.517271218	0.749393317	0.521665355	0.769903592	0.672272629	0.652173913	1	0	1	1	0	0.699516729	1	0.490635417	1	0.384615385	0.739066733
Lillebaelt_Clay	1	0.793814433	1	1	1	0.709213012	0.517271218	0.495129821	0.521665355	0.769903592	1	1	0.155903758	1	0	1	0	1	0.6243837	1	1	0.672272629	0.739066733
Limhamn	0.652173913	0.862441759	1	0.51165508	0.744243258	1	0.667407167	0.821013666	0.50365693	0.840568386	0.744243258	0.723705956	0.744243258	1	1	0	0.83814423	0.558428192	0.695051365	0.461821279	0.652173913	0.744243258	0.810985308
London_Clay	0.521665355	0.50824897	0.485452164	0.421745092	0.857945609	0.678344135	0.441020101	0.391304348	0.413289041	0.576630912	0.421745092	0.672237186	0.277397379	0	0	0.83814423	0	0.884062863	0.613231237	0.566651936	0.767327708	0.421745092	0.455916175
Maastricht	1	0.808970375	1	0.792314694	0.053909217	1	0.881422472	1	1	1	1	1	1	0.699516729	1	0.558428192	0.884062863	0	1	0.360156887	0.185617403	1	1
Monte_Solane	0.6243837	0.457472525	1	0.715469294	1	0.520147761	0.405932876	0.183509334	0.613231237	0.209019728	0.715469294	0.428571429	0.46083369	1	0.6243837	0.695051365	0.613231237	1	0	0.789586826	1	0.46083369	0.782422331
Nardo	0.490635417	0.60973312	1	0.522557933	0.374068321	1	0.554376658	0.822877597	0.63642574	0.645724833	0.838204273	0.818049355	0.838204273	0.490635417	1	0.461821279	0.566651936	0.360156887	0.789586826	0	0.490635417	0.838204273	0.804777598
Pindos_Unit	1	1	1	1	0.672272629	1	1	1	1	0.769903592	1	1	1	1	1	0.652173913	0.767327708	0.185617403	1	0.490635417	0	1	1
Ras_Gharib_A	0.672272629	0.32995774	0.575365882	0.54801965	1	0.441060775	0.271516848	0.52918998	0.421745092	0.573037089	0.54801965	0.313115179	0.54801965	0.384615385	0.672272629	0.744243258	0.421745092	1	0.46083369	0.838204273	1	0	0.506768538
Stolleklint_Clay	0.230769231	0.425492157	0.695744624	0.357476701	1	0.867374416	0.517673858	0.626796513	0.192676136	0.766949872	0.831230103	0.447286751	0.506768538	0.739066733	0.739066733	0.810985308	0.455916175	1	0.782422331	0.804777598	1	0.506768538	0
